# Supplementary material for: The conserved Wdr8-hMsd1/SSX2IP complex localises to the centrosome and ensures proper spindle length and orientation
Source: PubMed Central journal article supplement — Biochem Biophys Res Commun. 2015 Dec 4;468(1-2):39–45. doi: 10.1016/j.bbrc.2015.10.169 (PMC4669408; doi:10.1016/j.bbrc.2015.10.169), 2015-12-04

Supplementary Figure S1 Hori A. et al

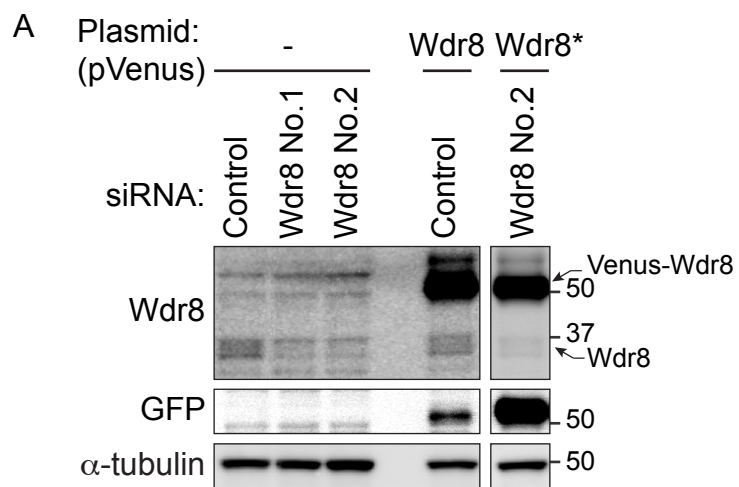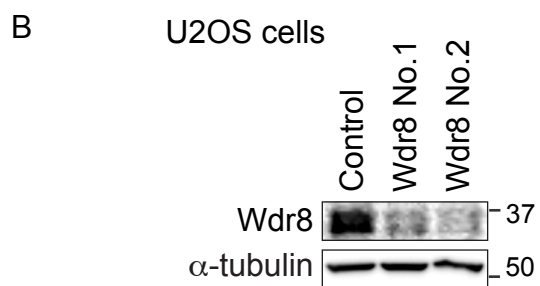

## Supplementary Figure S2 Hori A. et al

| Gene names   | Peptide coverage (%) |
|--------------|----------------------|
| Wdr8/WRAP73  | 57                   |
| CPSF4        | 45                   |
| TUBB4B       | 31                   |
| DSP          | 20                   |
| NuMA         | 15                   |
| AKAP8        | 13                   |
| C9orf114     | 10                   |
| ZC3H14       | 6.7                  |
| SDCCAG3      | 5.1                  |
| hMsdl/SSX2IP | 4.6                  |
| PHF14        | 4.6                  |
| NCOA5        | 3.3                  |
| SPICE1       | 2.1                  |
| CTNND1       | 2.2                  |

Supplementary Figure S3 Hori A. et al

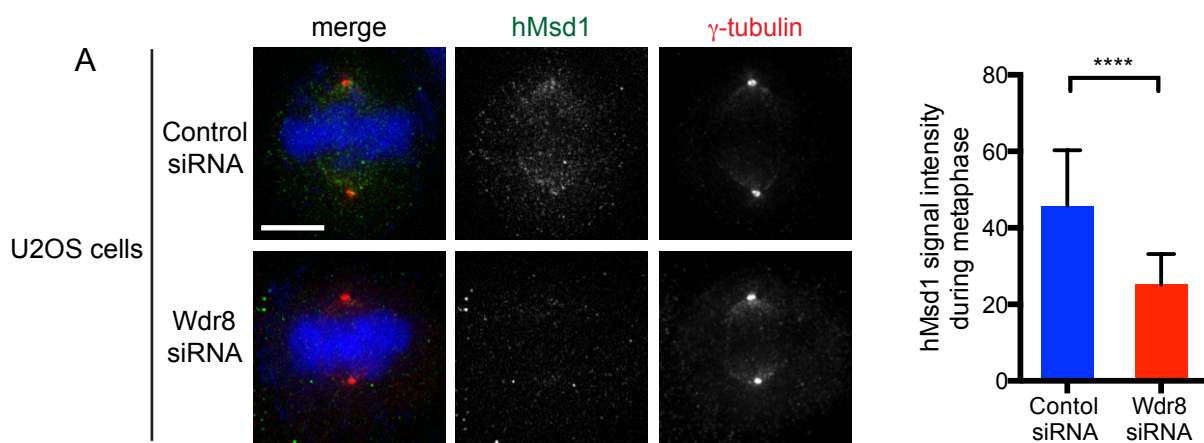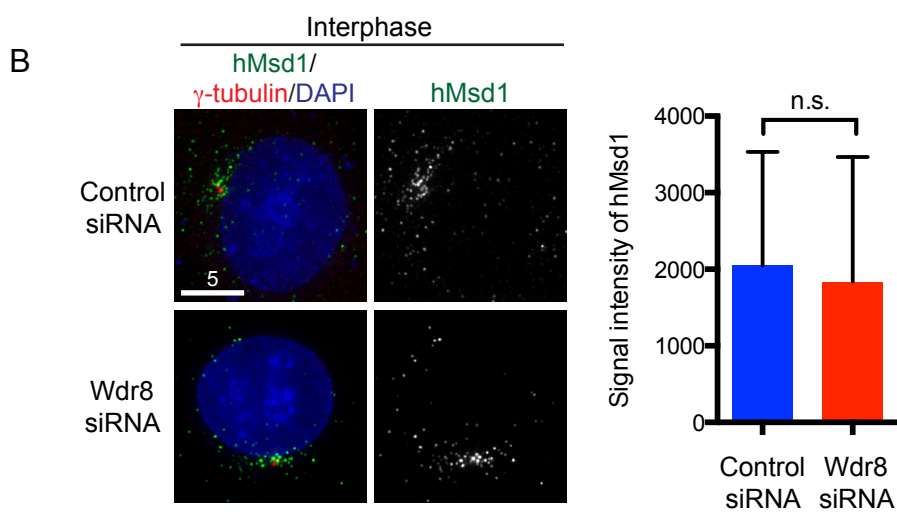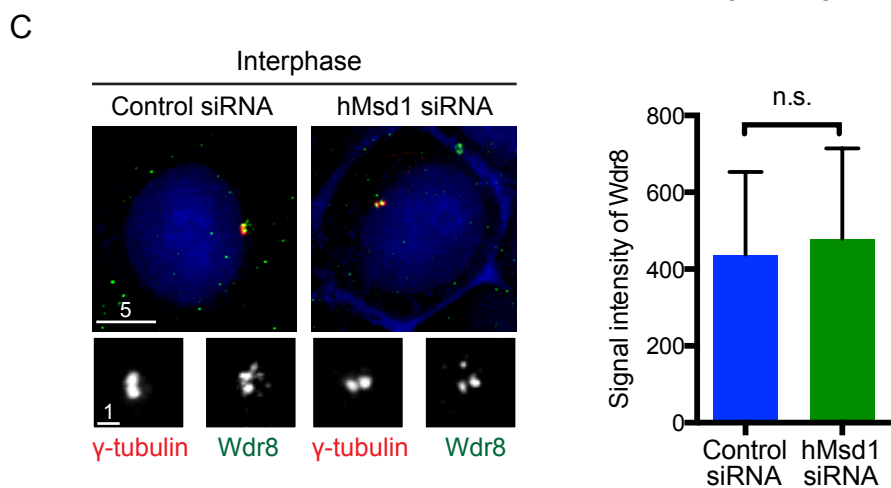

Supplementary Figure S4 Hori A. et al

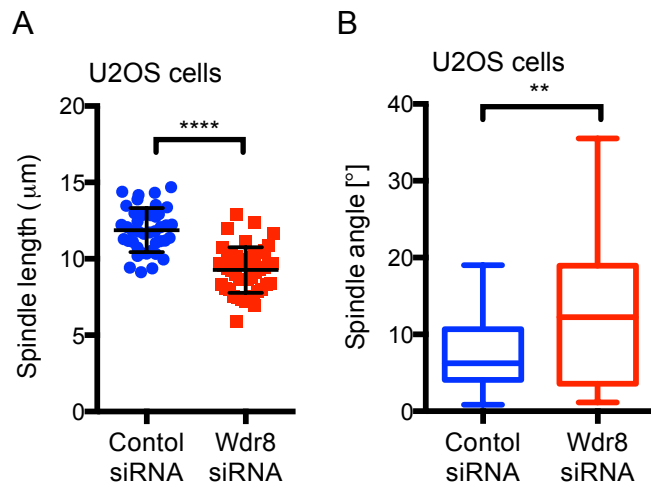

Supplement: mmc1.pdf [file mmc1.pdf]
